# Supplementary material for: Combined treatment of thymoquinone and embelin epigenetically attenuates epithelial-to-mesenchymal transition inducing tumor regression by efficiently suppressing stemness factors through EGFR-RAS-MAPK axis colonospheres
Source: Research Square preprint supplement (doi:10.21203/rs.3.rs-8251018/v1), 2026-01-23
Supplement: Supplementary file 1 [file 8f33b340bfdbeabbe4cbe3b7.docx]

**Combined treatment of thymoquinone and embelin epigenetically attenuates epithelial-to-mesenchymal transition inducing tumor regression by efficiently suppressing stemness factors through EGFR-RAS-MAPK axis colonospheres**

Supplementary files:

Supplementary Figure: 1


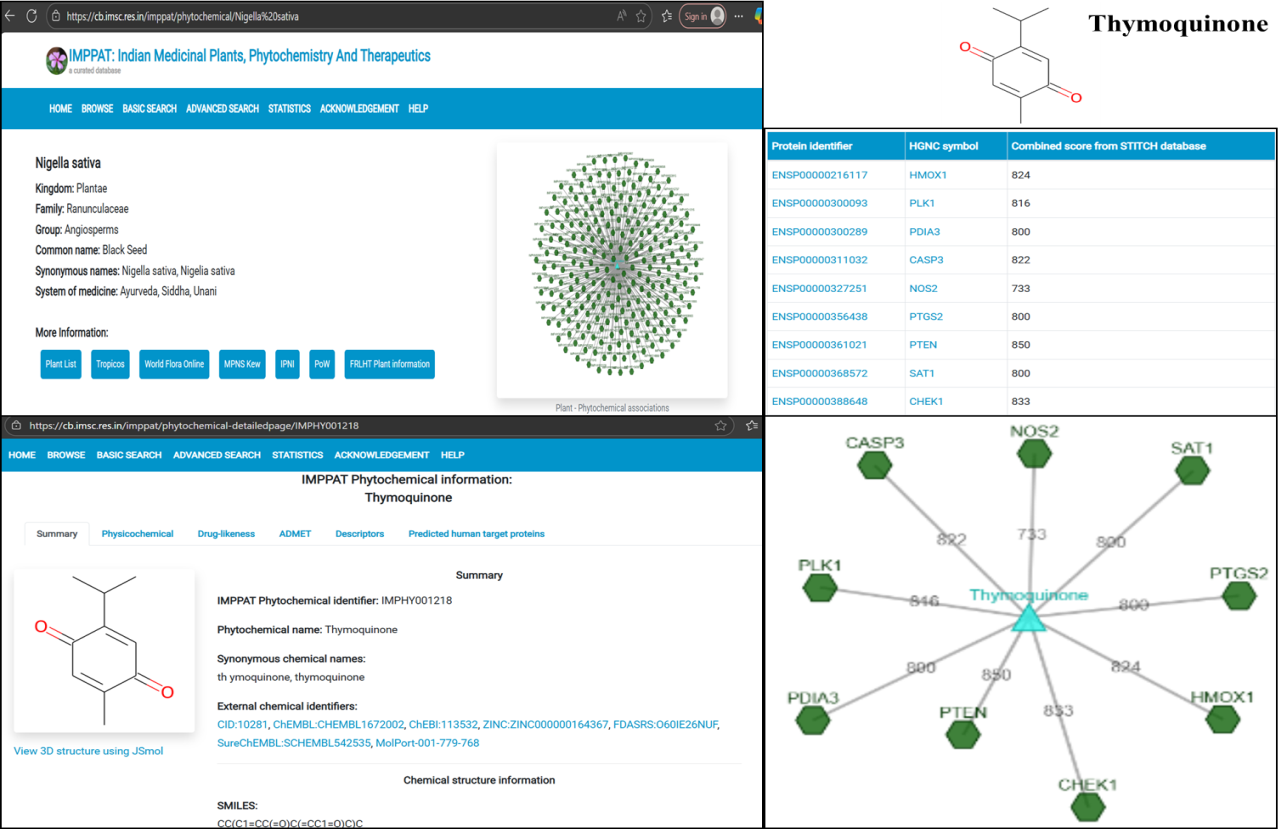


Supplementary Figure: 2


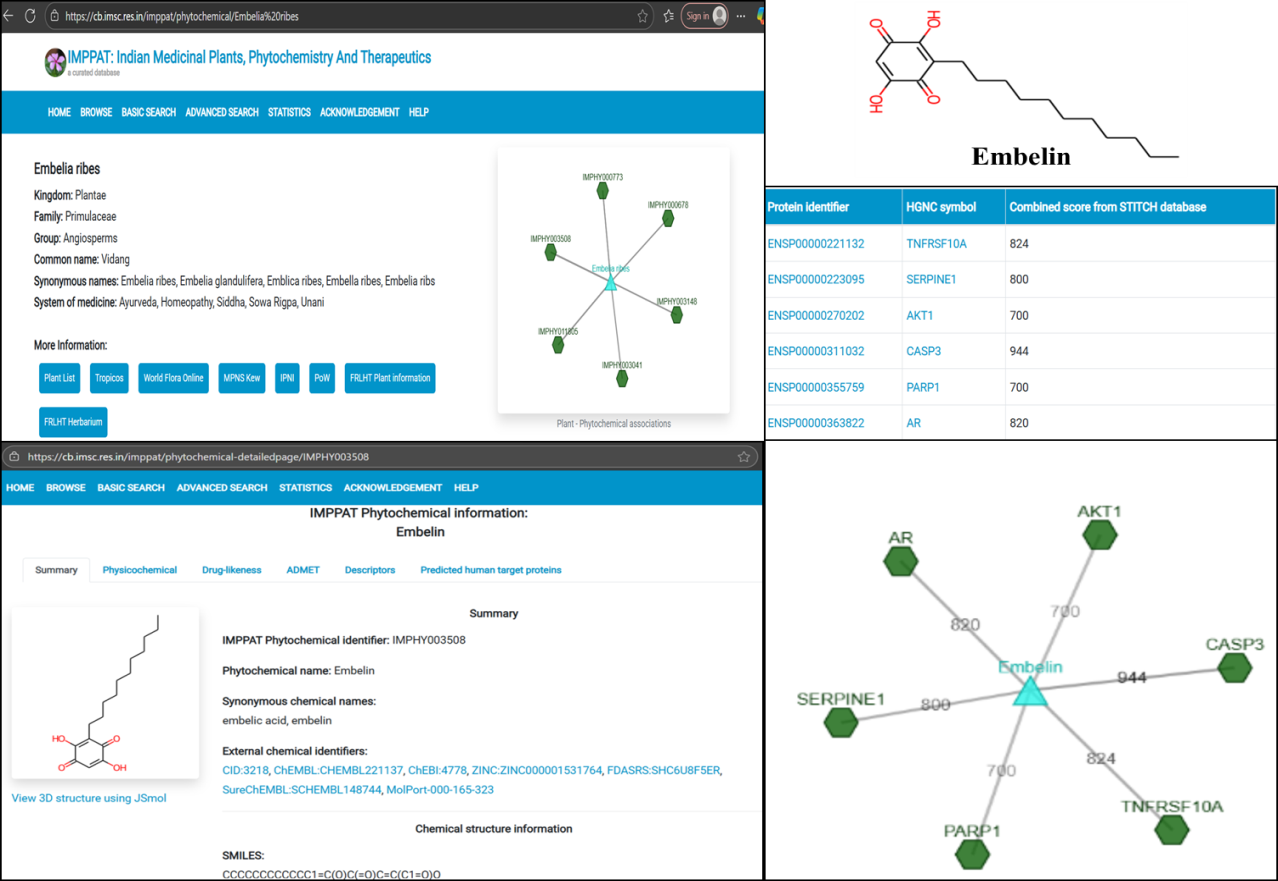


Supplementary Figure: 3


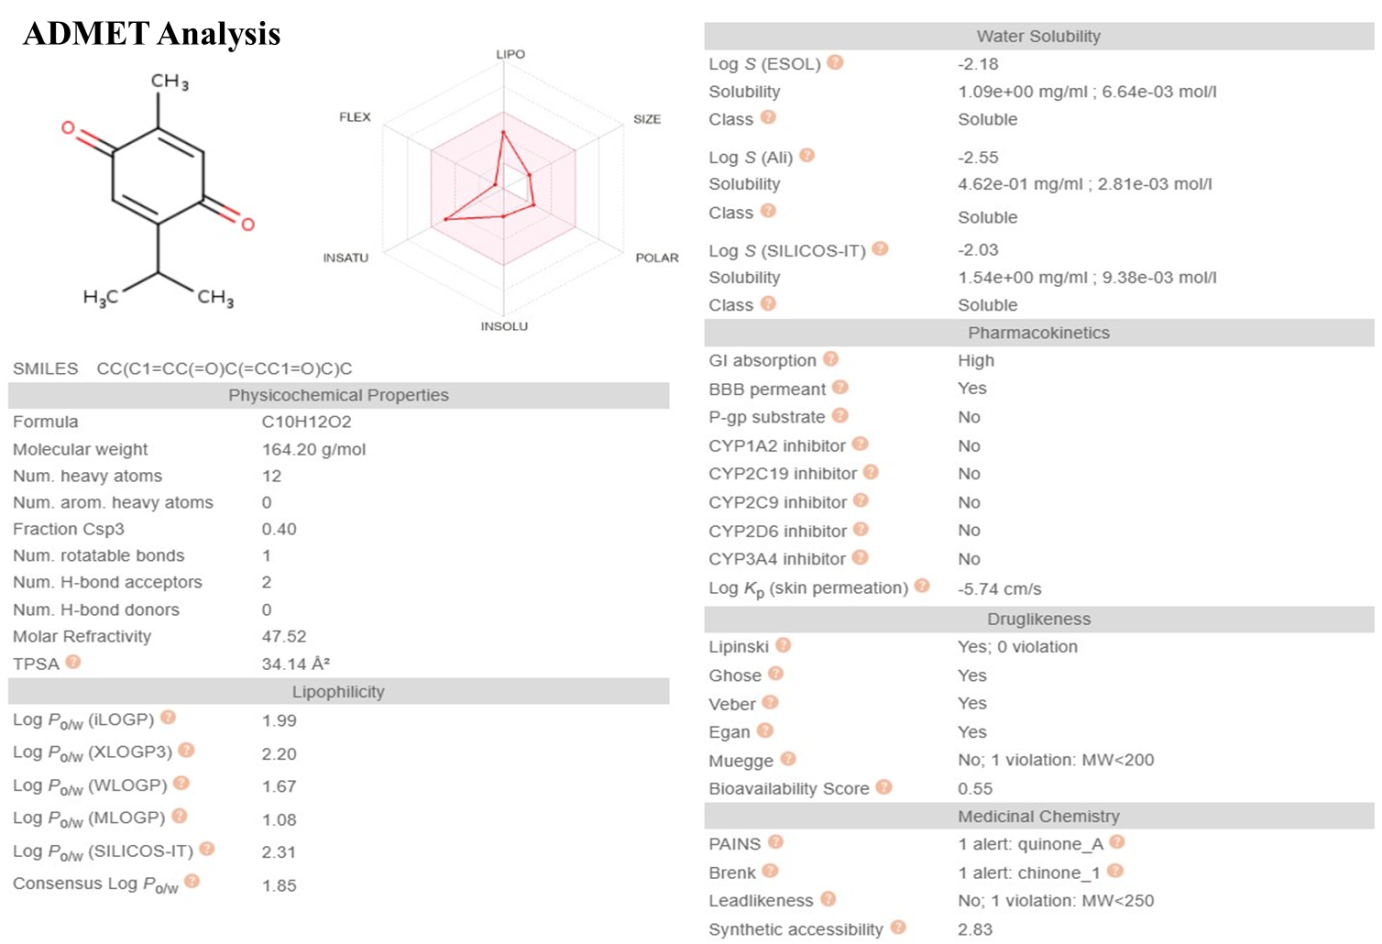


Supplementary Figure: 4


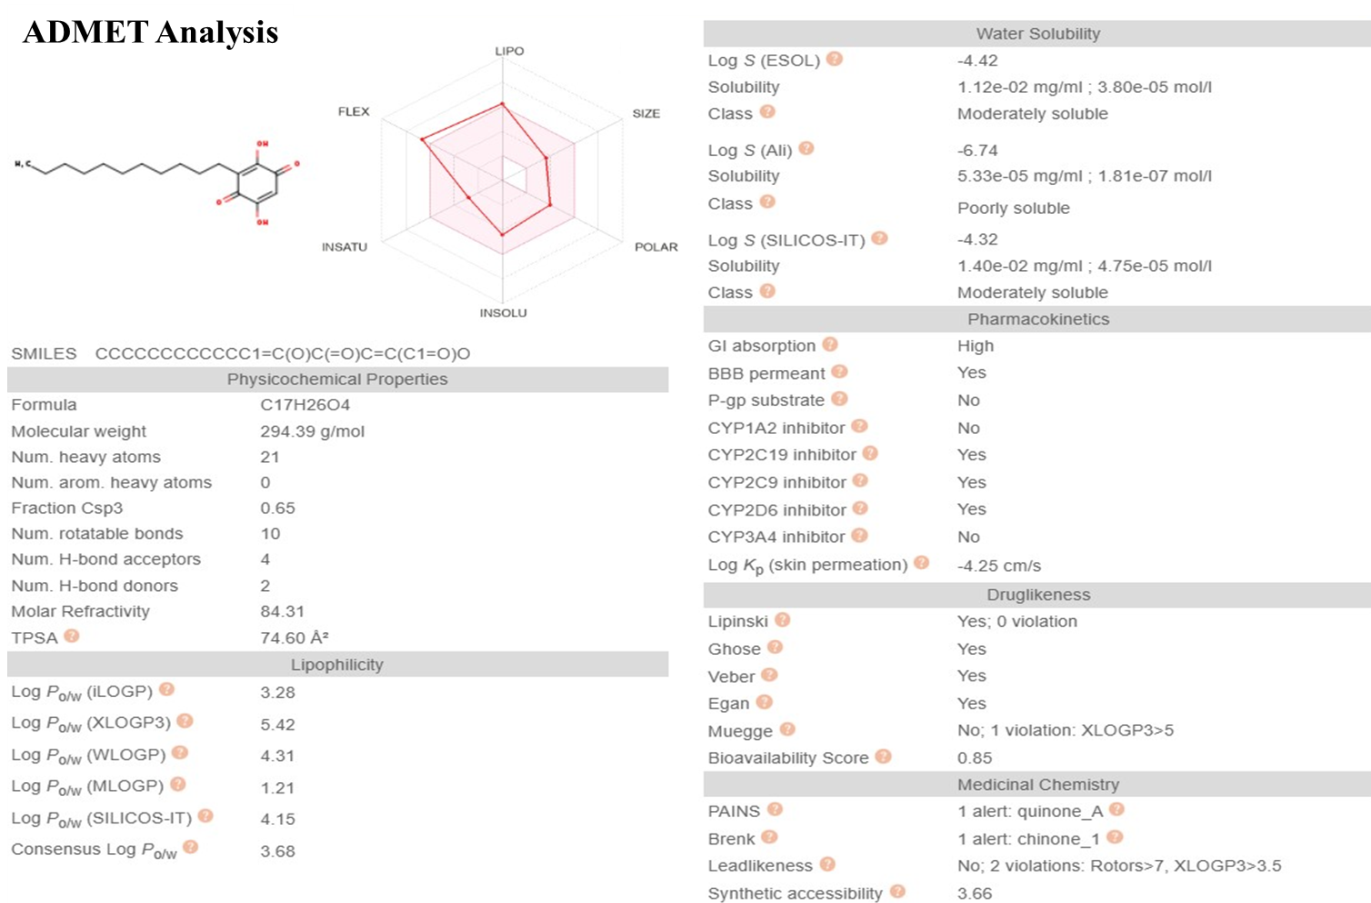


Supplementary Figure: 5


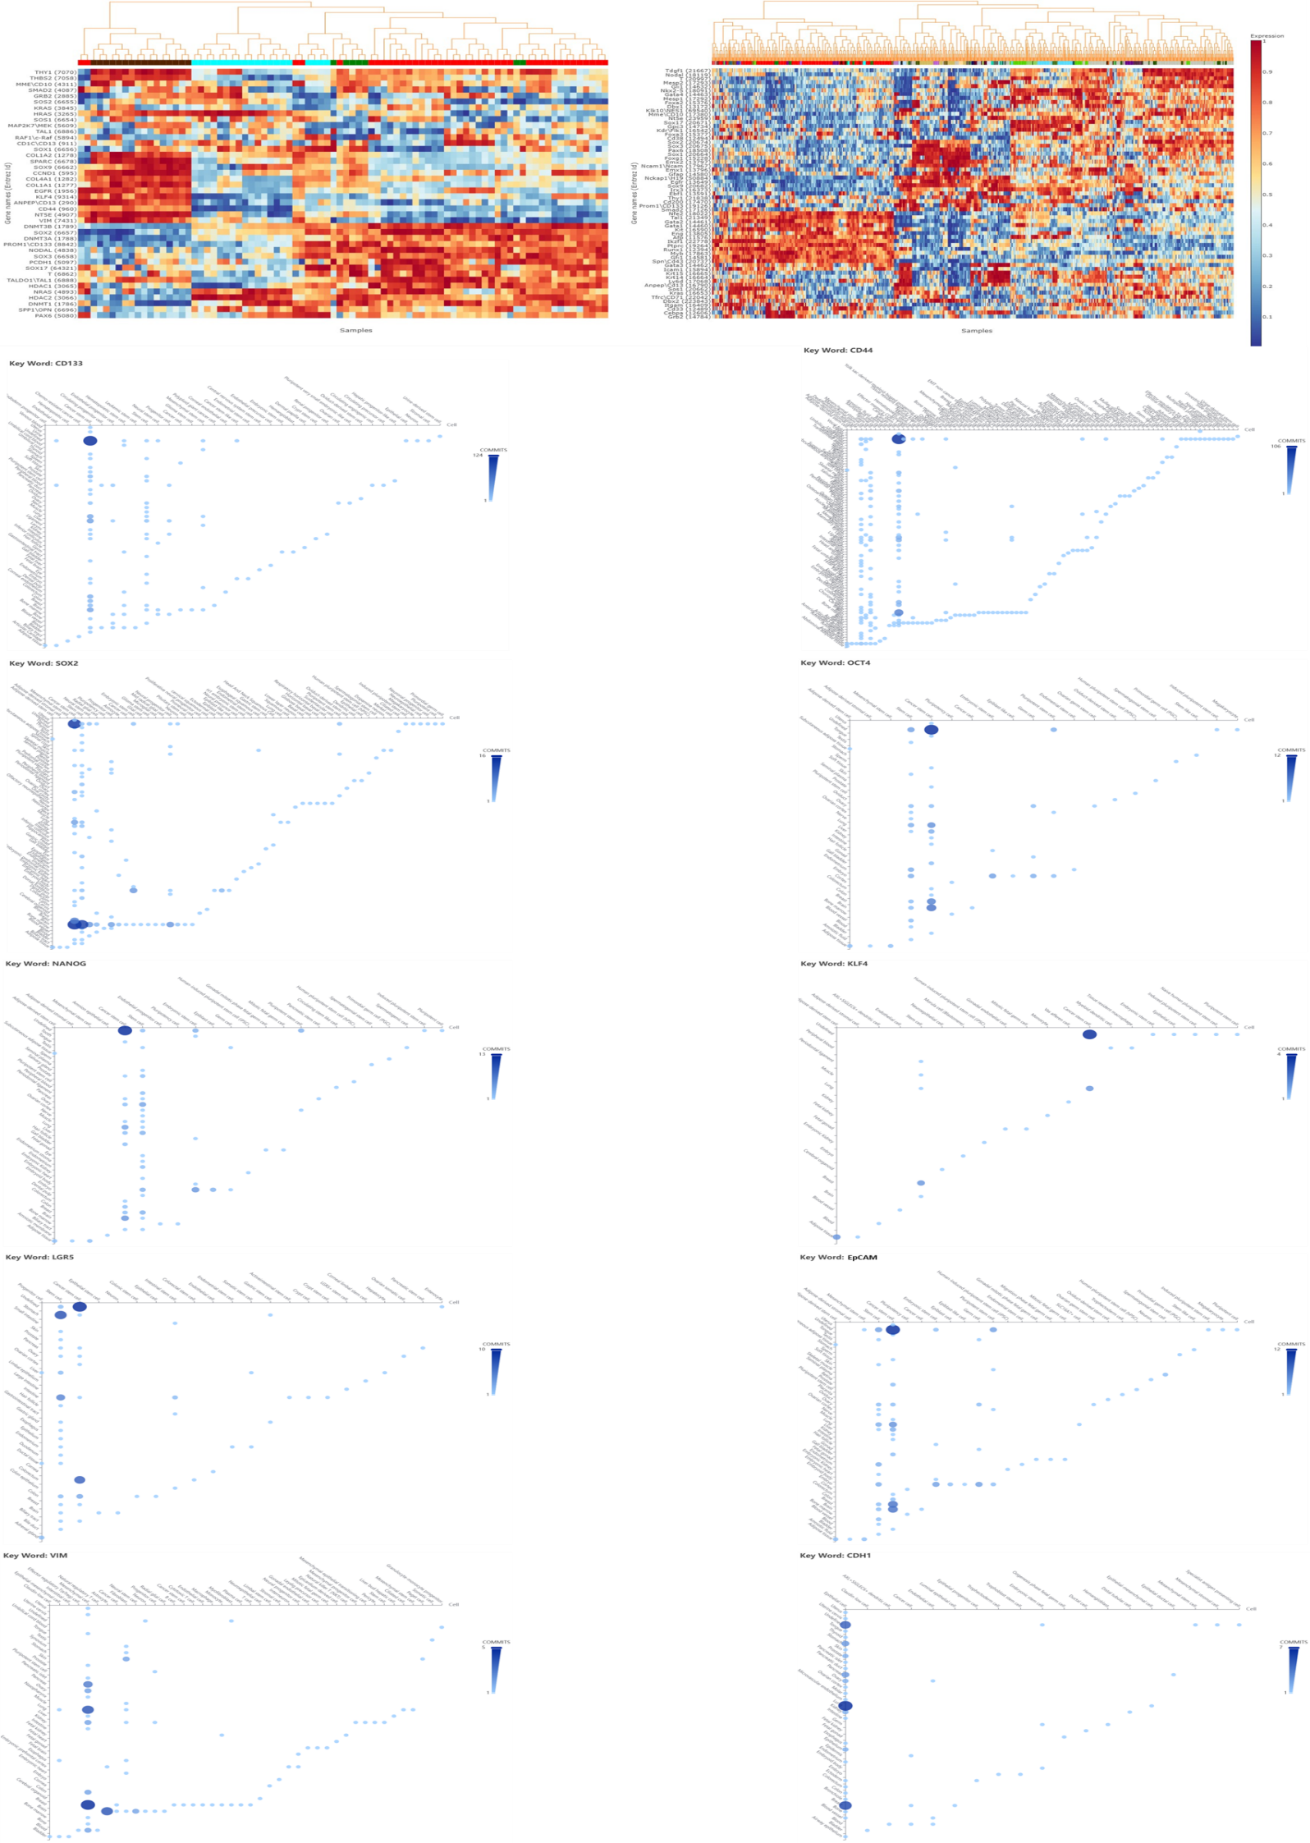


Supplementary Figure: 6


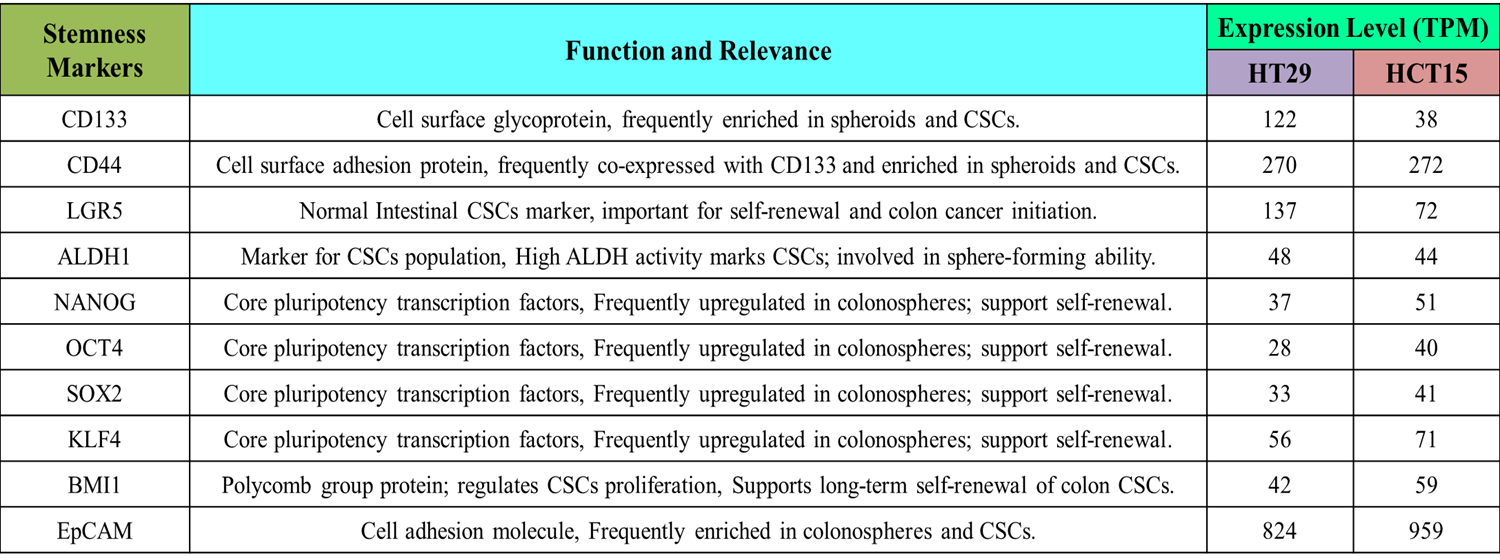


Supplementary Figure: 7


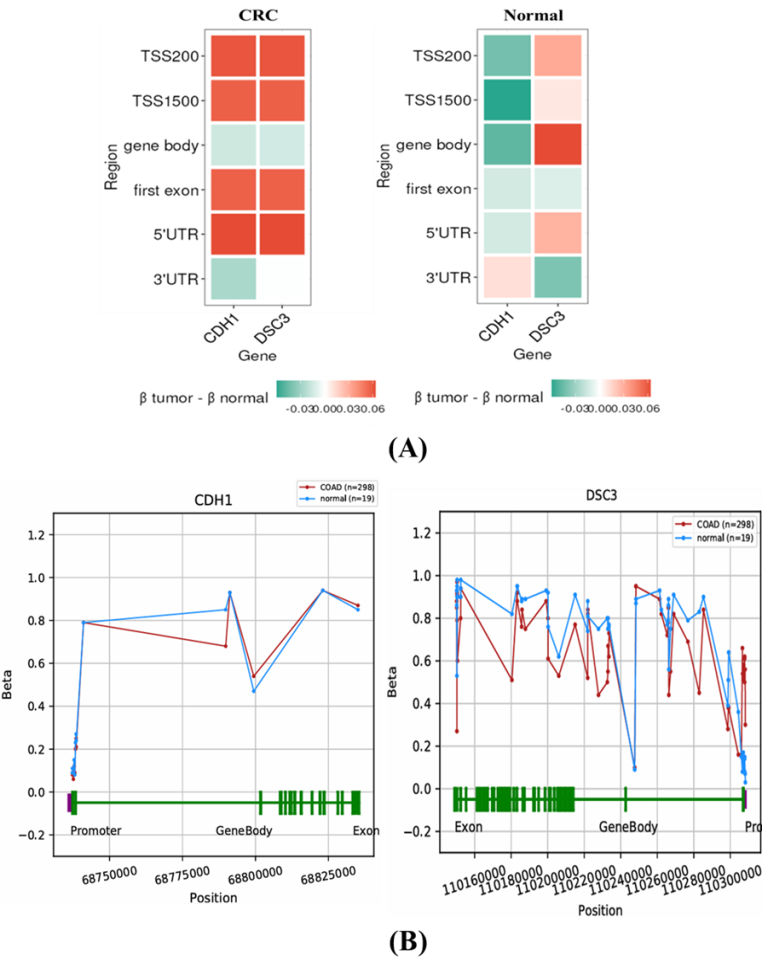


Supplementary Figure: 8


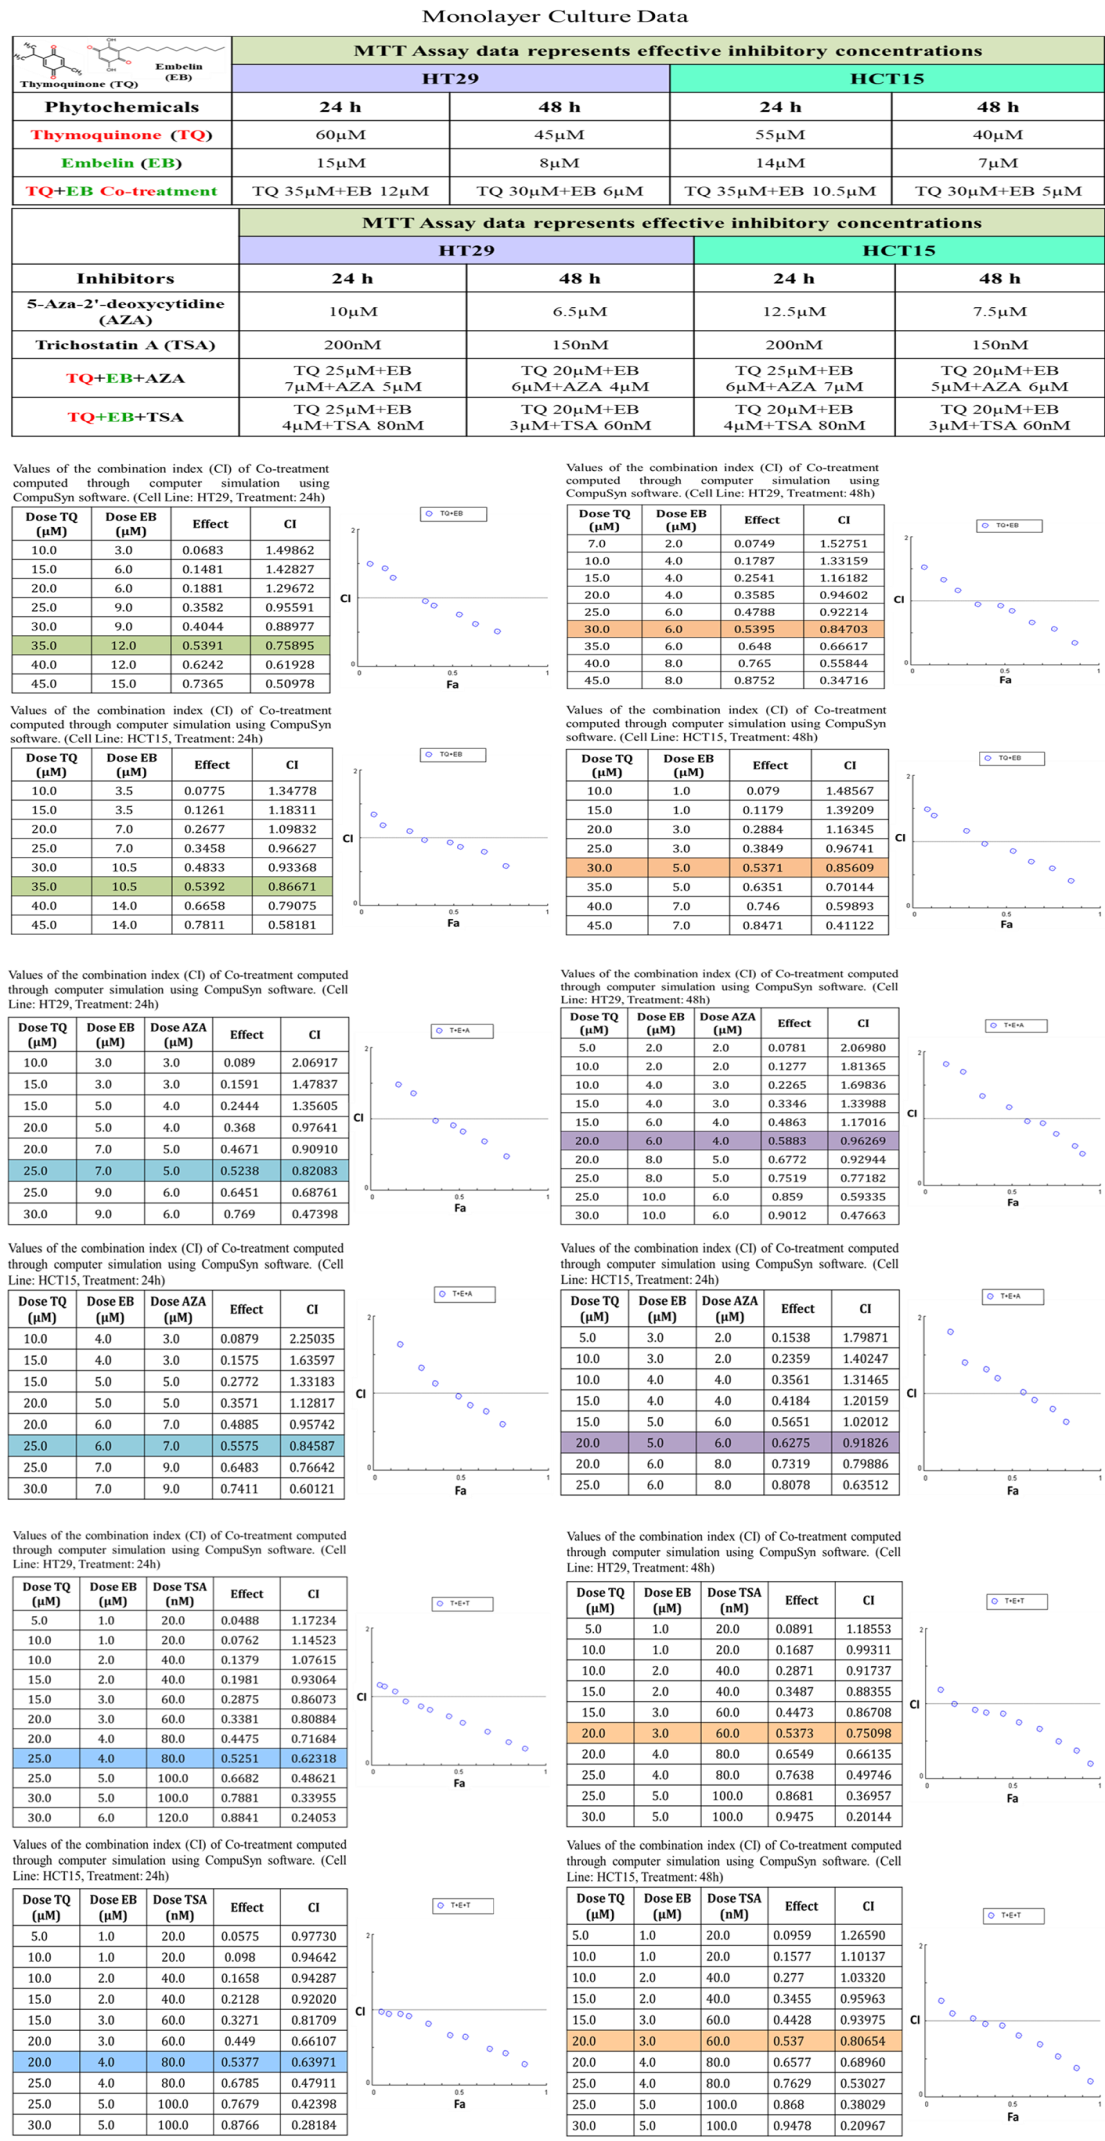


Supplementary Figure: 9


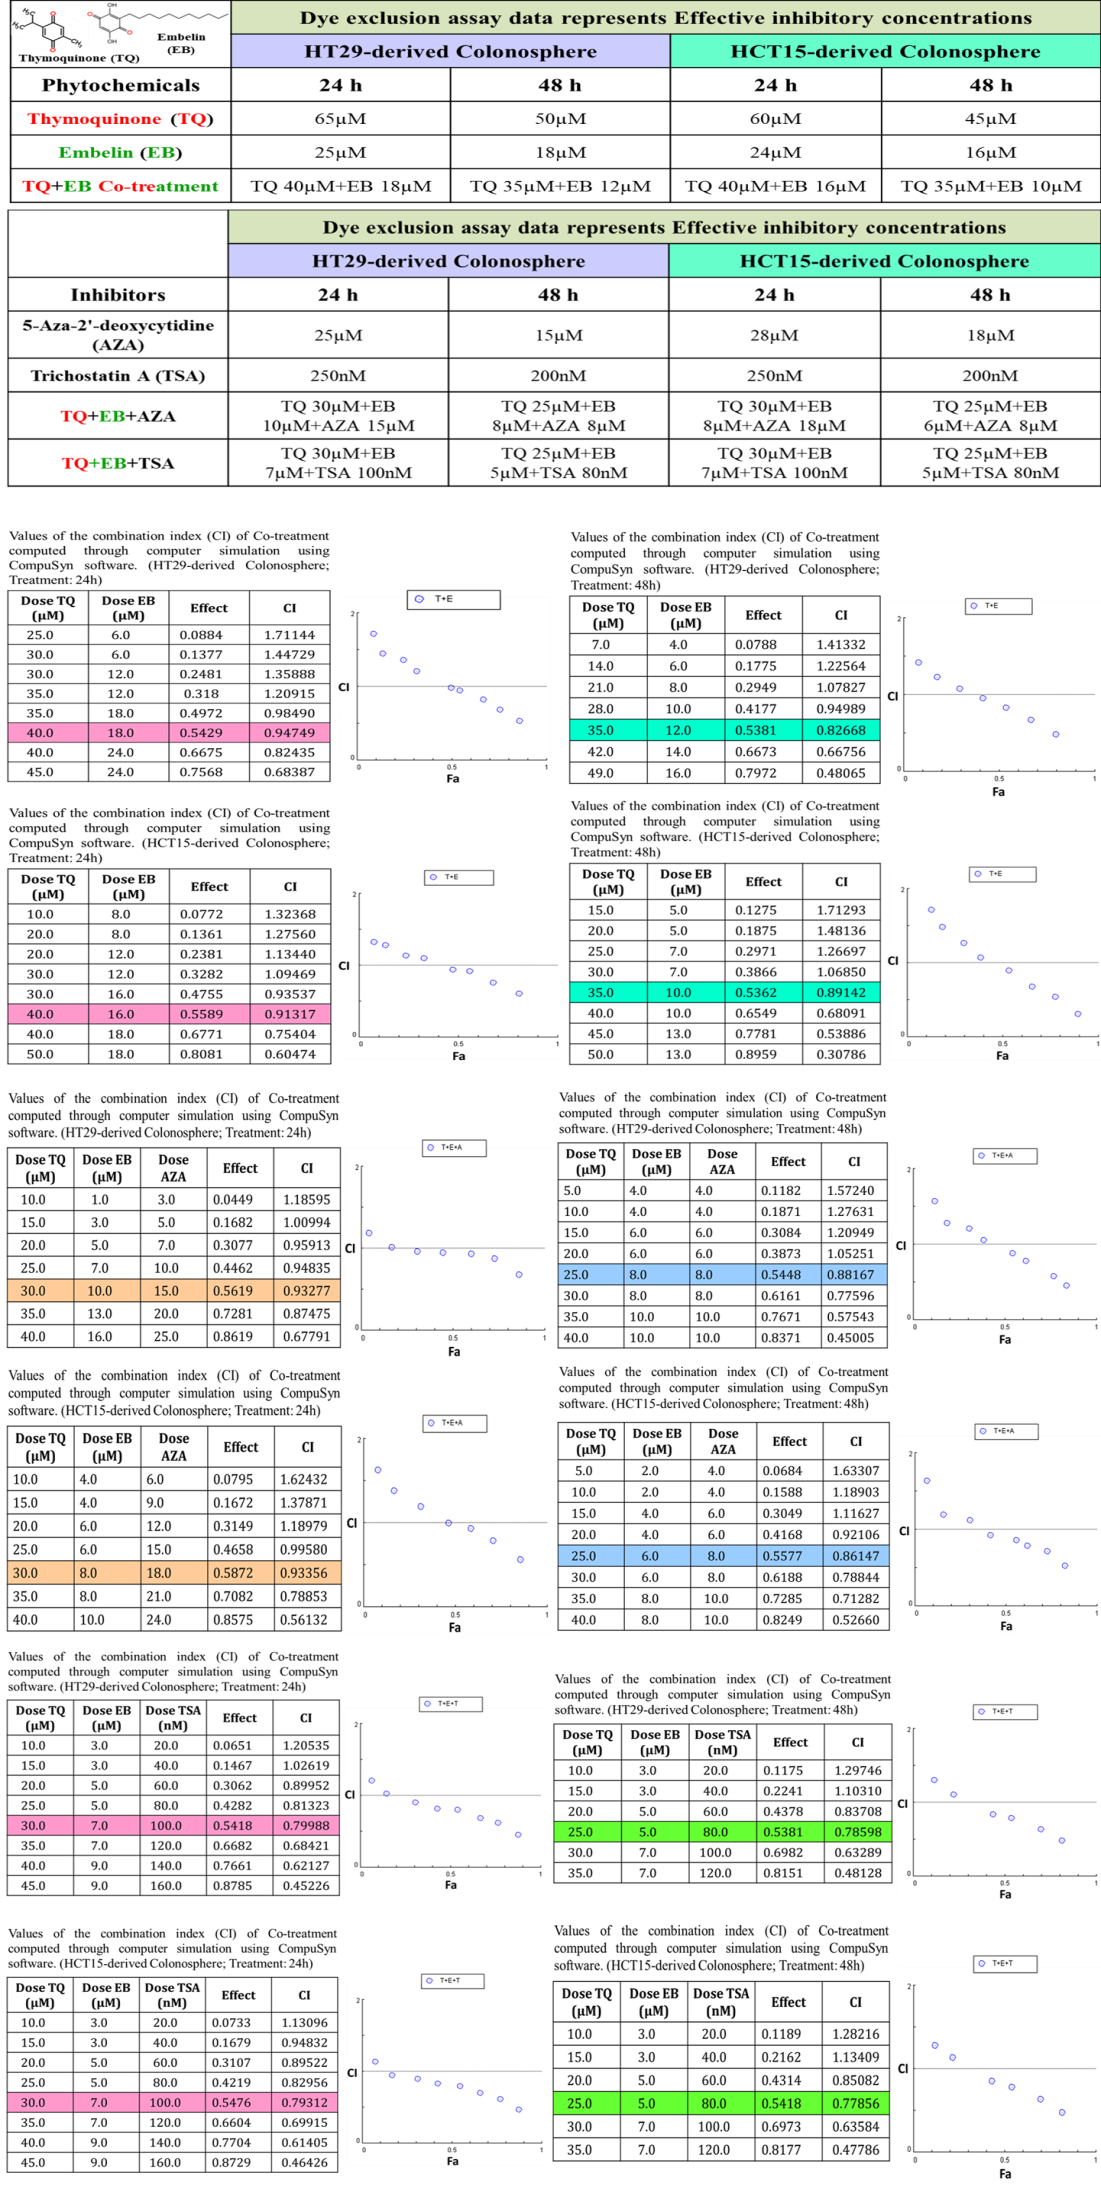


Supplementary Figure: 10


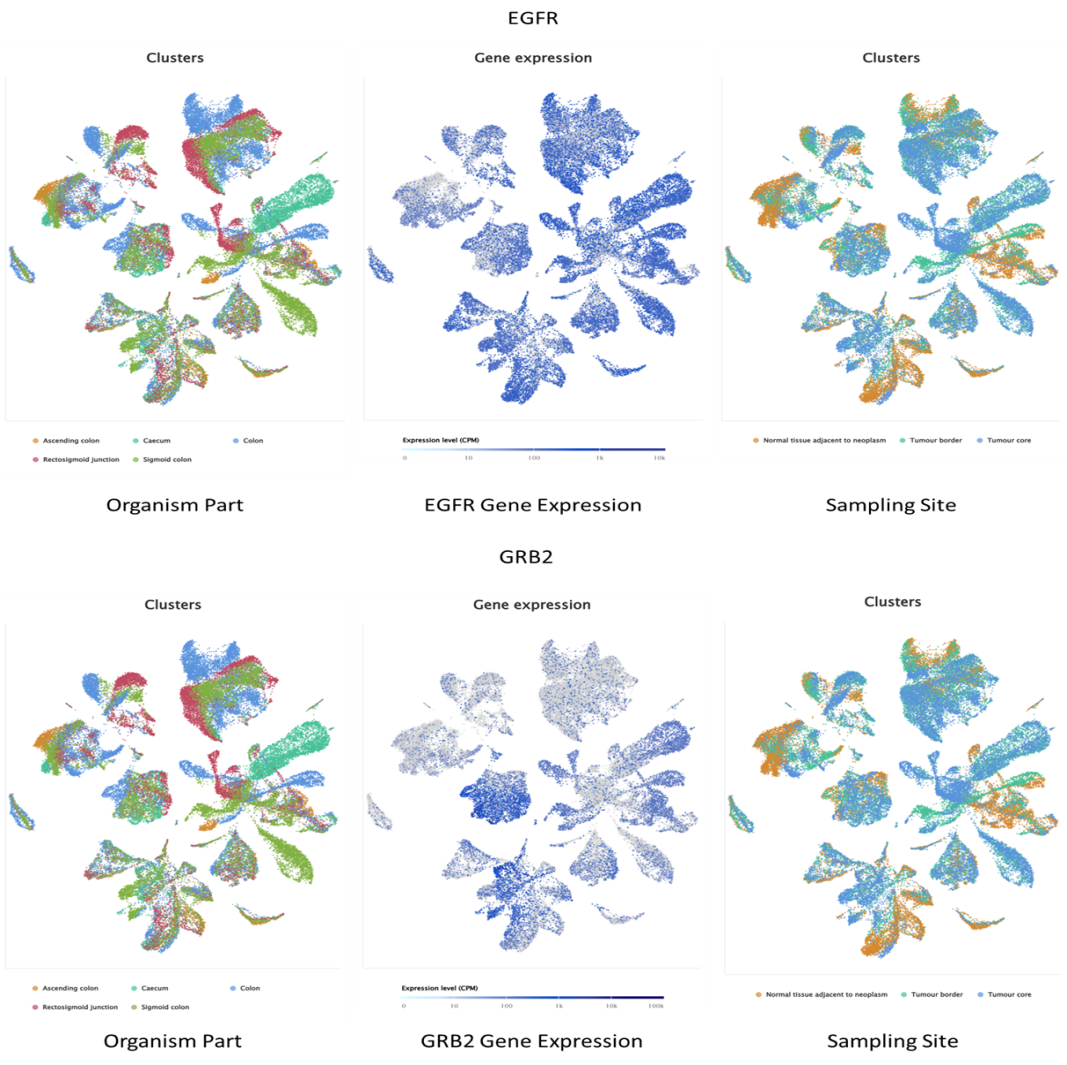


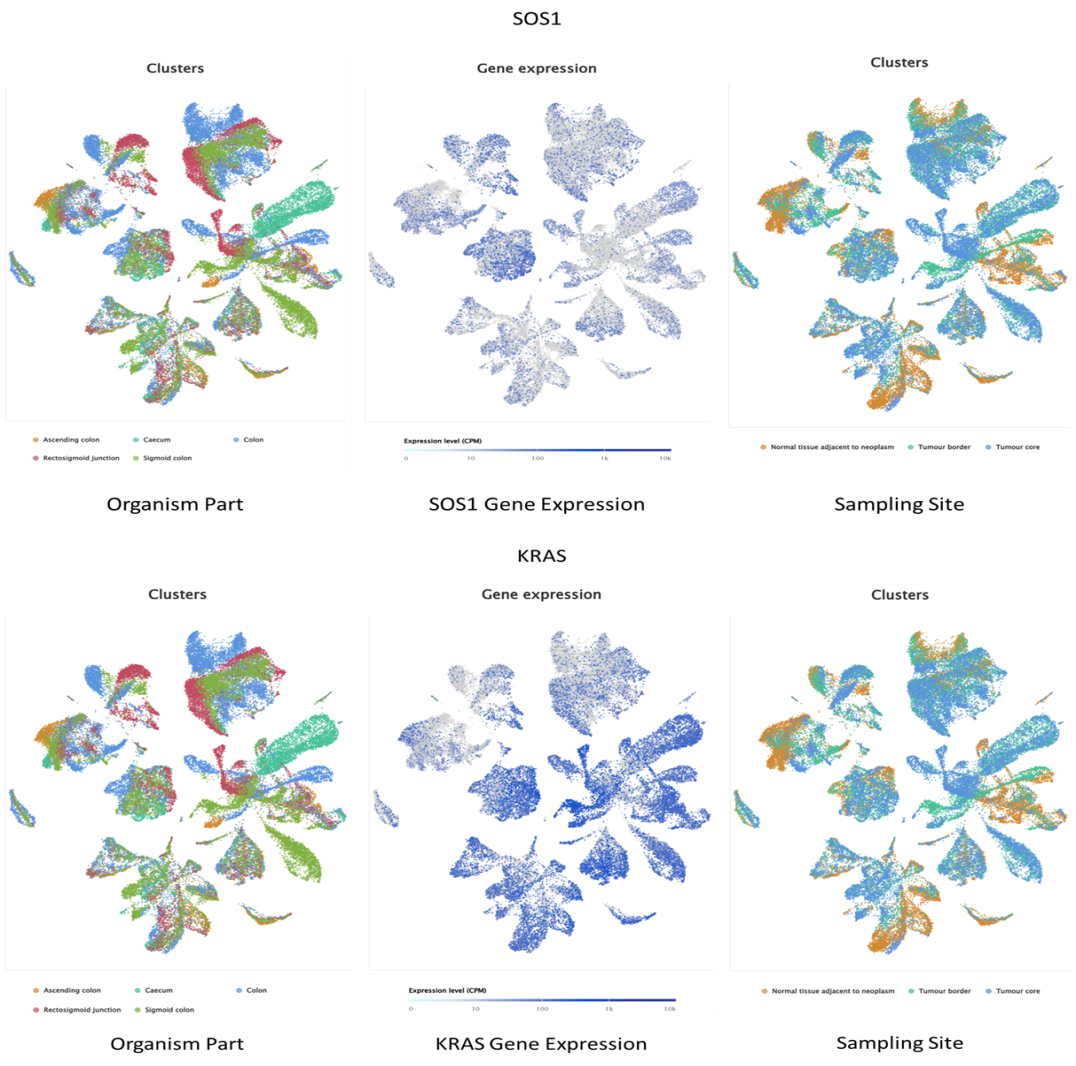


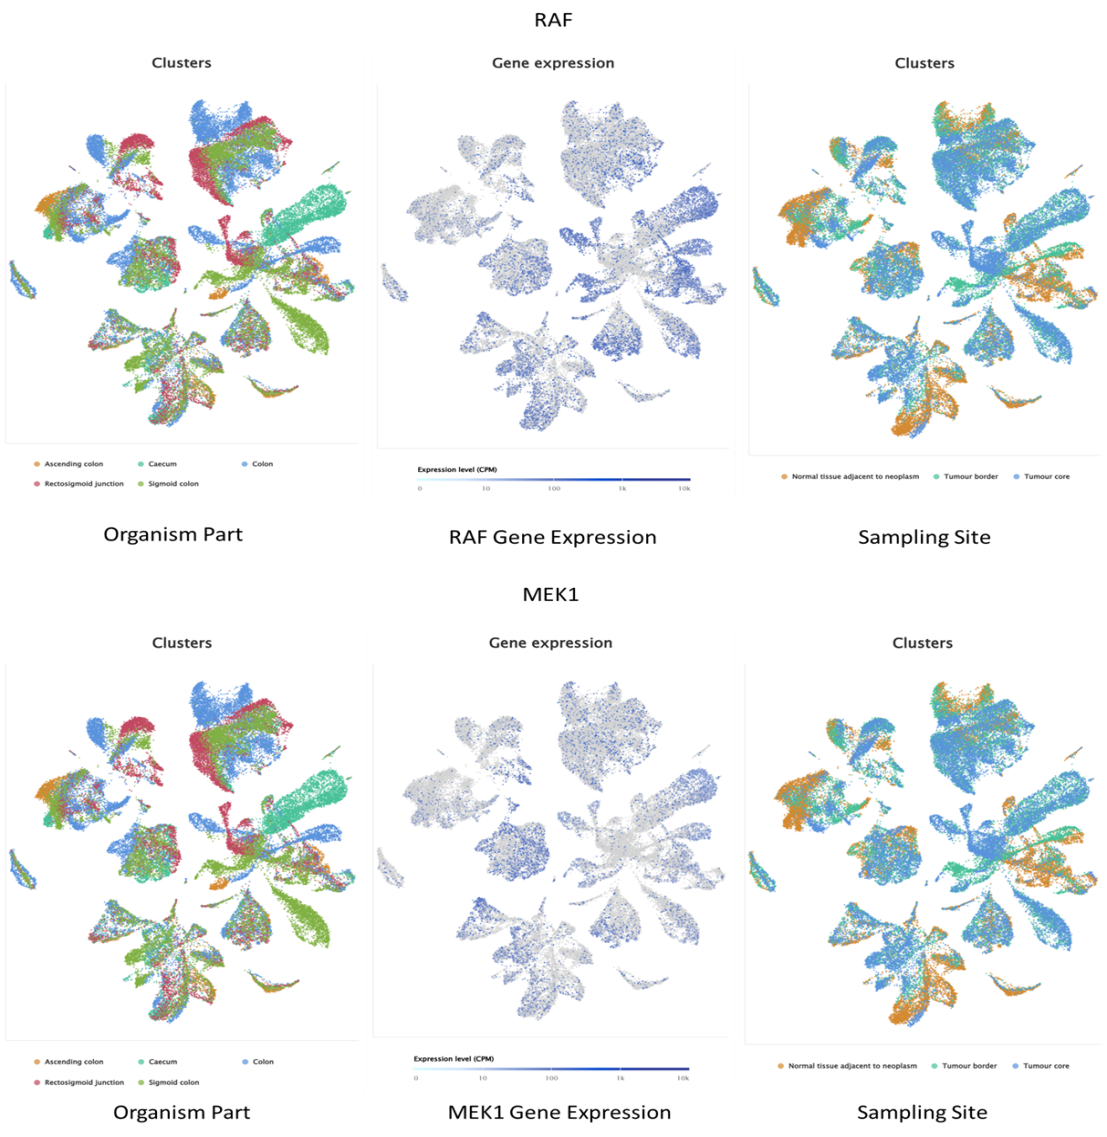


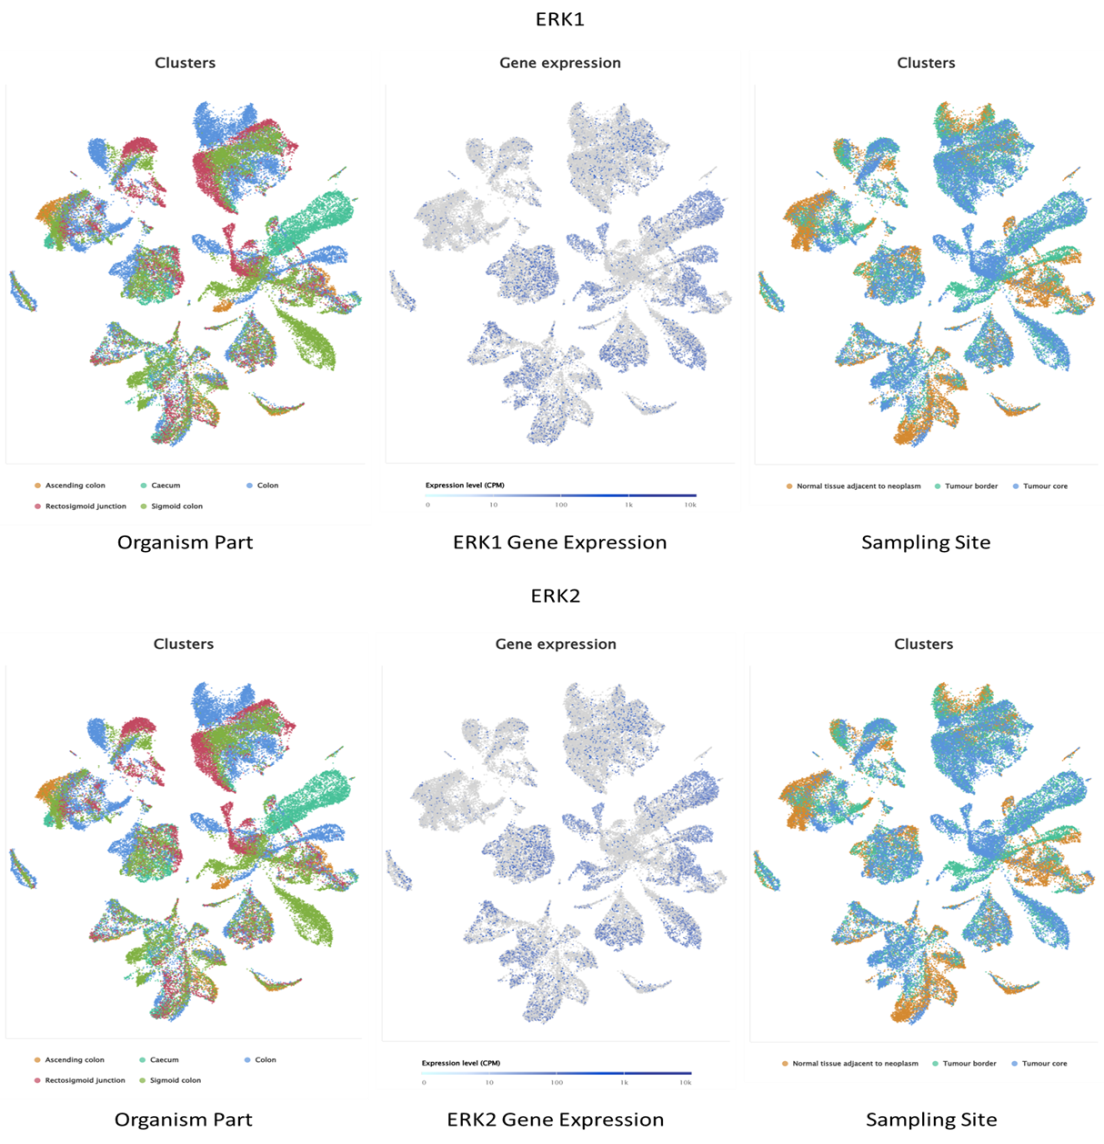


Supplementary Figure: 11


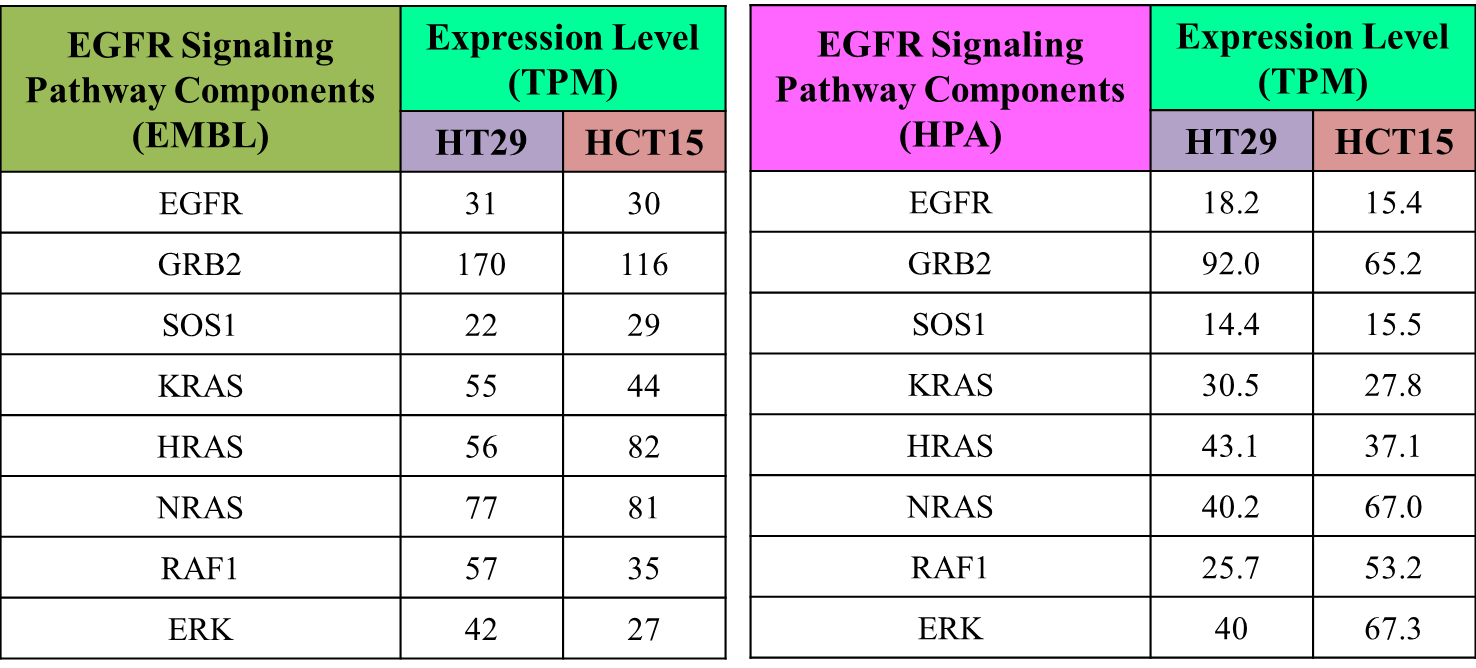


Supplementary Figure: 12


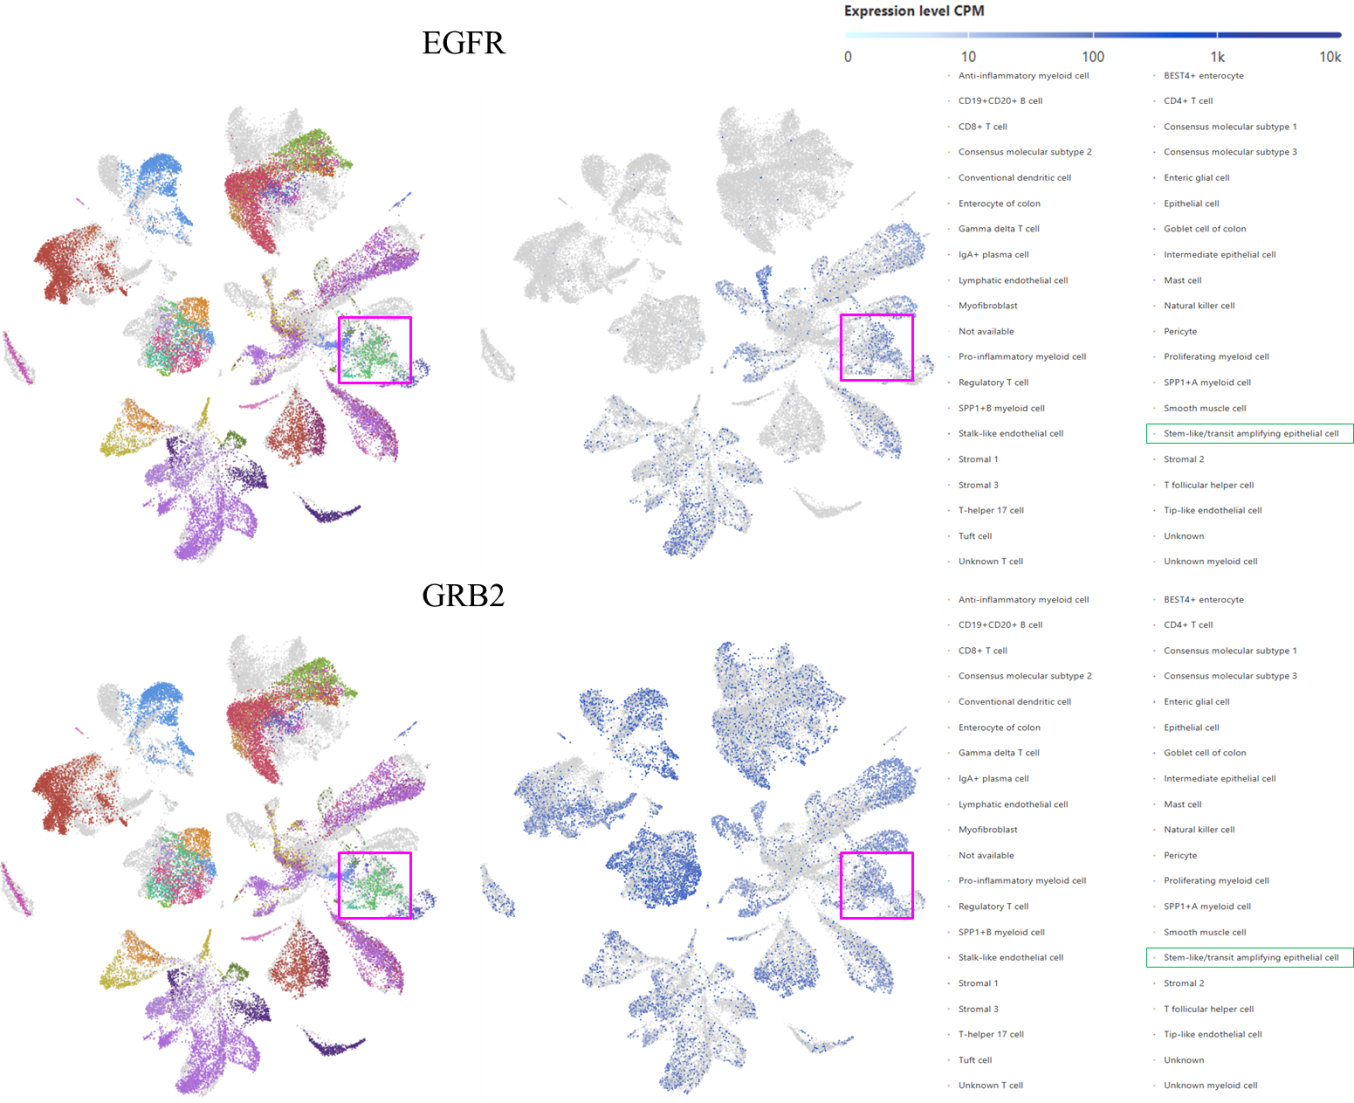


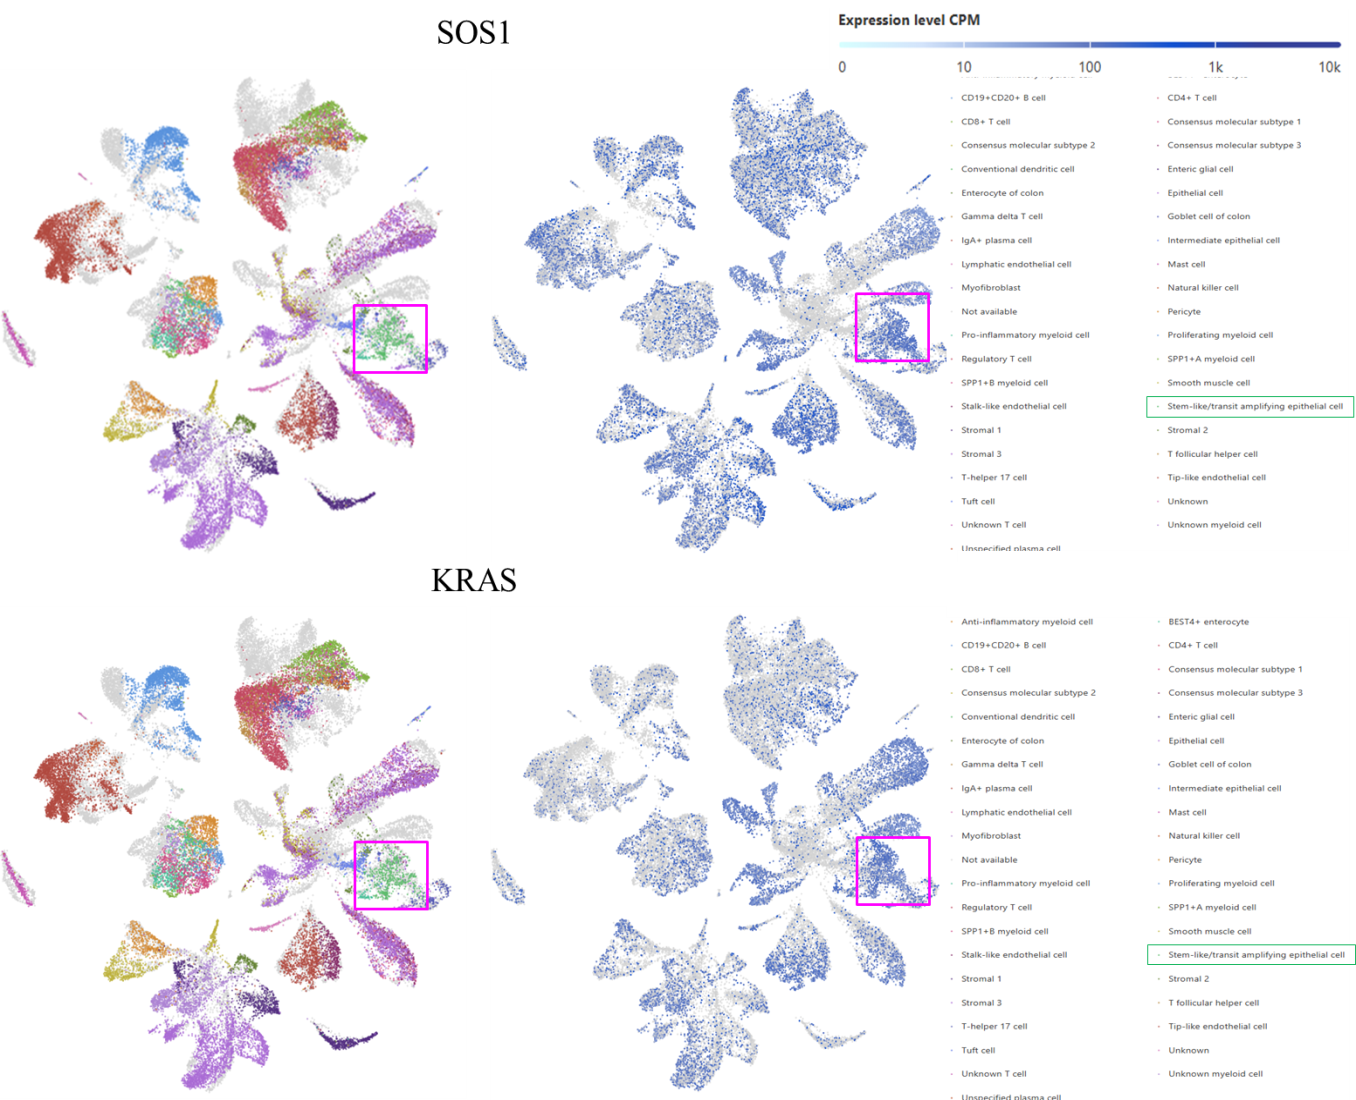


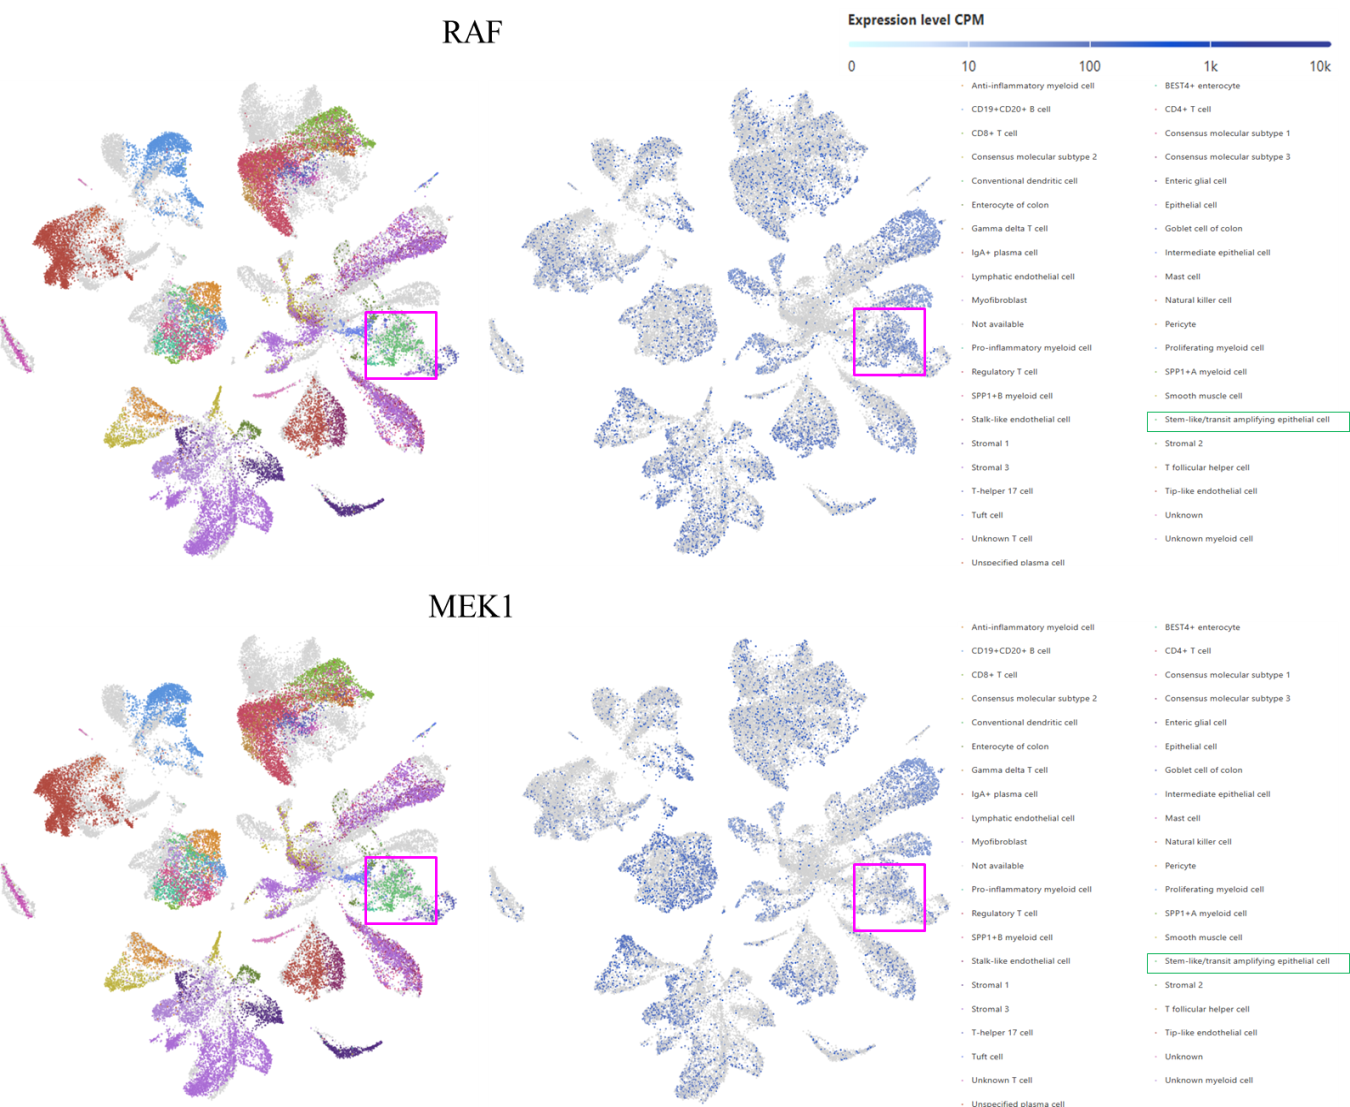


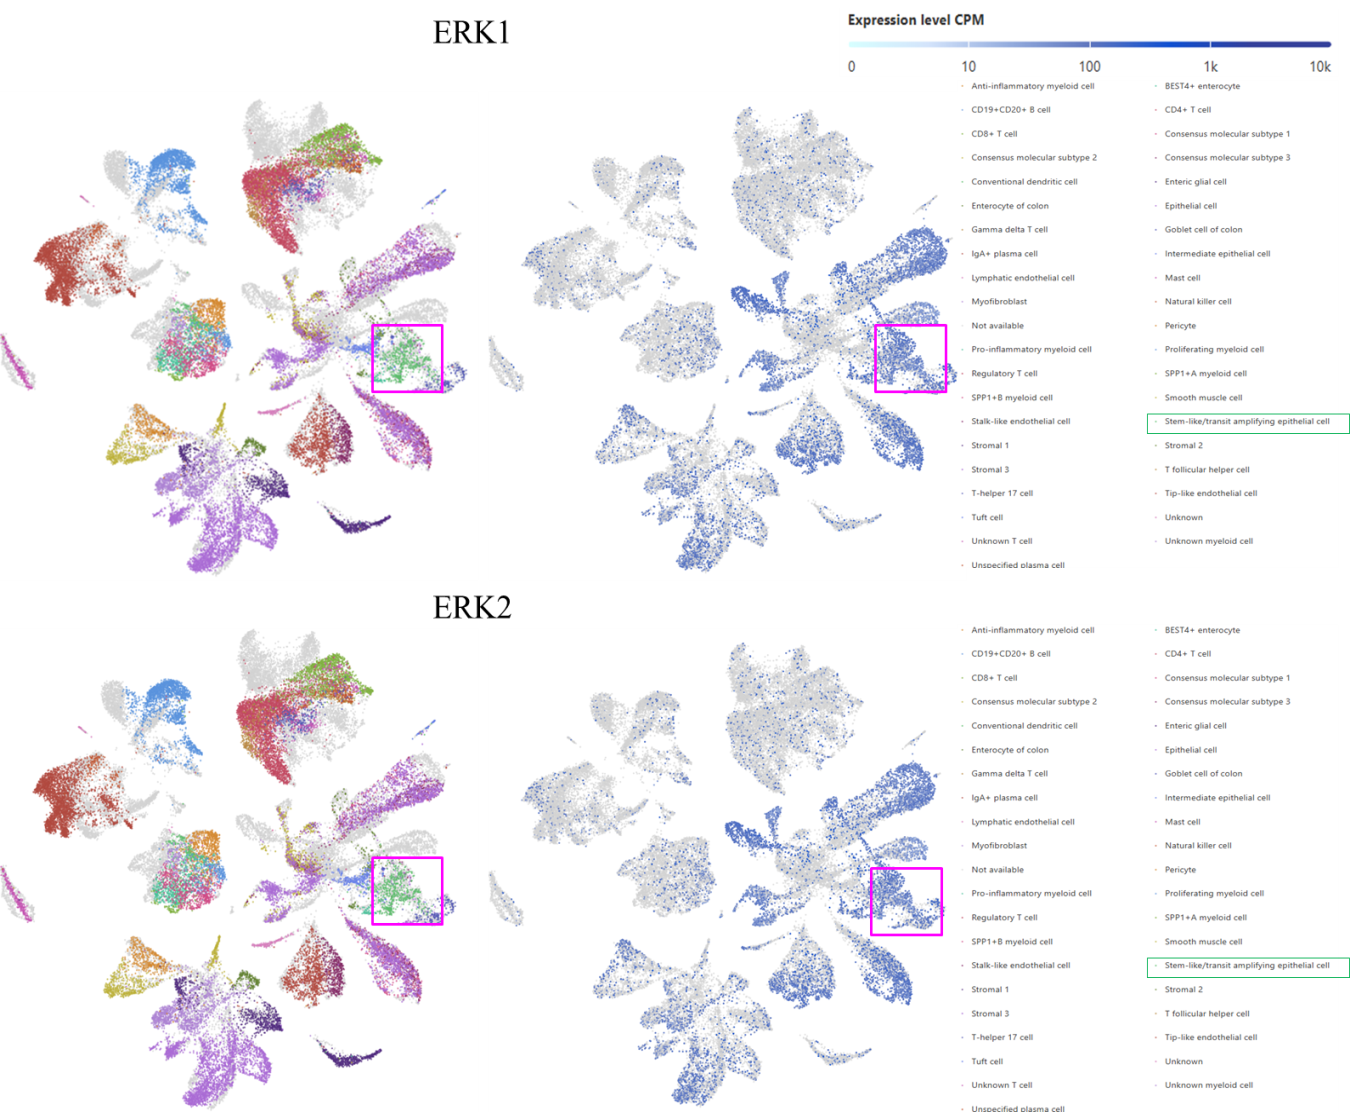


Supplementary Table: 1 Primer sequences for PCR analysis

| Gene | Primer sequence |
| --- | --- |
| *CD133* | F 5'-ACACTACCAAGGACAAGGCG-3'  R 5'-TCTCCAACGCCTCTTTGGTC-3' |
| *CD44* | F 5'-CTGCAGGTATGGGTTCATAG-3'  R 5'-ATATGTGTCATACTGGGAGGTG-3' |
| *OCT4* | F 5'-AGCAAAACCCGGAGGAGT-3'  R 5'-CCACATCGGCCTGTGTATATC-3' |
| *SOX2* | F 5'-GGAAATGGAGGGGTGCAAAAGAGG-3'  R 5'-TTGCGTGAGTGTGGATGGGATTGGTG-3' |
| *NANOG* | F 5'-TCCTCCTCTTCCTCTATACTAAC-3'  R 5'-CCCACAATCACAGGCATAG-3' |
| *KLF4* | F 5'-ACCCACACTTGTGATTACGC-3'  R 5'-CCGTGTGTTTACGGTAGTCC-3' |
| *TWIST1* | F 5'-CCCACGCCCTGTTTCTTTGA-3'  R 5'-ACAGCCGCAGAGACCTAAAC-3' |
| *SNAIL* | F 5'-TCTAGGCCCTGGCTGCTACAA-3'  R 5'-ACATCTGAGTGGGTCTGGAGGTG-3' |
| *SLUG* | F 5'-AGTGATGGGGCTGTATGCTC-3'  R 5'-CTCCCTCCCTTTTCTTTCCCAG-3' |
| *Vimentin* | F 5'-GGTTCAGGTTTCATTCATGCCT-3'  R 5'-AGTTGGCTGTGTGTACTGCT-3' |
| *E-cadherin* | F 5'-CGAGAGCTACACGTTCACGG-3'  R 5'-GGGTGTCGAGGGAAAAATAGG-3' |
| *ABCG2* | F 5'-ACGAACGGATTAACAGGGTCA-3'  R 5'-CTCCAGACACACCACGGAT-3' |
| *SUV39H1* | F 5'-CCTGCCCTCGGTATCTCTAAG-3'  R 5'-ATATCCACGCCATTTCACCAG-3' |
| *SUV39H2* | F 5'-TCTATGACAACAAGGGAATCACG-3'  R 5'-GAGACACATTGCCGTATCGAG-3' |
| *G9a* | F 5'-CCATGTAGCGACTTTCCCGGC-3'  R 5'-TGAAGCTCAAGAGGTGAC-3' |
| *EZH2* | F 5'-TGCAGTTGCTTCAGTACCCATAAT-3'  R 5'-ATCCCCGTGTACTTTCCCATCATAAT-3' |
| *MLL1* | F 5'-AAGAGCAGGTAAACTCTCTCCTC-3'  R 5'-TTCCTCTCCGTCGTACAATTTG-3' |
| *MLL2* | F 5ꞌ-TTGTCCTTGGGACTCGAATCA-3ꞌ  R 5ꞌ-CCTGTCCAGATCCAACTCTTCT-3ꞌ |
| *SMYD3* | F 5'-CGCGTCGCCAAATACTGTAGT-3'  R 5'-CAAGAAGTCGAACGGAGTCTG-3' |
| *β-Actin* | F 5'-CTGGAACGGTGAAGGTGACA-3'  R 5'-AAGGGACTTCCTGTAACAACGCA-3' |
| *COL4A1* | F-5'-CAGGCACCCCATCTGTTGAT-3'  R-5'-CATTGCCTTGCACGTAGAGC-3' |
| *THBS2* | F-5'-CGTGGACAATGACCTTGTTG-3'  R-5'-GCCATCGTTGTCATCATCAG-3' |
| *SPP1* | F-5'-TGAGAGCAATGAGCATTCCGATG-3'  R-5'-CAGGGAGTTTCCATGAAGCCAC-3' |
| *DNMT1* | F 5′-GGCTGAGATGAGGCAAAAAG-3′  R 5′-ACCAACTCGGTACAGGATGC-3′ |
| *DNMT3A* | F 5′-AATGTGAATCCAGCCAGGAAAGGC-3′  R 5′-ACTGGATTACACTCCAGGAACCGT-3′ |
| *DNMT3B* | F 5′TATTGATGAGCGCACAAGAGAGC-3′  R 5′-GGGTGTTCCAGGGTAACATTGAG-3′ |
| *ITGB1* | F 5′ CAAATTGTGGGTGGTGCACA 3′  R 5′ TGGAGGGCAACCCTTCTTT 3′ |
